# Supplementary material for: Structural Details of BH3 Motifs and BH3-Mediated Interactions: an Updated Perspective
Source: Front Mol Biosci. 2022 May 24;9:864874. doi: 10.3389/fmolb.2022.864874 (PMC9171138; doi:10.3389/fmolb.2022.864874)
Supplement: Supplementary file 1 [file Table1.XLSX]

## Sheet: Sheet 1
Table 1
pdb_id	bcl2_protein (UniProt name)	bh3_interactor (UniProt name)	bcl2_protein_sequence_coverage	bh3_interactor_sequence_coverage	bcl2_protein_modifications	bh3_interactor_modifications	complex_topology	experimental_technique	resolution (A)	pubmed_id
1BXL	Bcl-2-like protein 1	Bcl-2 homologous antagonist/killer	A:1-44;85-209	B:72-87	///	///	canonical	solution nmr	///	9020082
1G5J	Bcl-2-like protein 1	Bcl2-associated agonist of cell death	A:1-48;89-214	B:103-126	///	///	canonical	solution nmr	///	11206074
1ZY3	Bcl-2-like protein 2	BH3-interacting domain death agonist	A:2-171	B:82-101	A:V117P.R133Q	B:R84K(R203K)	canonical	solution nmr	///	16475813
2K7W	Apoptosis regulator BAX	Bcl-2-like protein 11	A:1-192	B:145-164	///	///	canonical	solution nmr	///	18948948
2KBW	Induced myeloid leukemia cell differentiation protein Mcl-1	BH3-interacting domain death agonist	A:167-326	B:76-106	///	///	canonical	solution nmr	///	20392693
2LP8	Bcl-2-like protein 1	Bcl-2 homologous antagonist/killer	A:1-44,85-209	B:72-87(1002-1017)	///	B:Q73C(Q1003C).Q77A(Q1007A).I80A(I1010A).I81F(I1011F).D84C(D1014C)	canonical	solution nmr	///	22515821
2M04	Bcl-2-like protein 1	Bcl-2-binding component 3	A:1-44;85-209	B:130-154	///	///	canonical	solution nmr	///	23340338
2M5B	Bcl-2 homologous antagonist/killer	BH3-interacting domain death agonist	A:18-186	B:80-101	MK8	B:Q92[MK8].S96[MK8].M97[NLE]	canonical	solution nmr	///	23604079
2P1L	Bcl-2-like protein 1	Beclin-1	A:2-26;83-198 C:2-26;83-198 E:2-26;83-198 G:2-26;83-198	B:107-1328 D:107-128 F:107-128 H:107-128	///	///	helix 1 dimer	x-ray diffraction	2.5	17337444
2PON	Bcl-2-like protein 1	Beclin-1	B:1-44;85-196	A:106-128	///	///	canonical	solution nmr	///	17659302
2PQK	Induced myeloid leukemia cell differentiation protein Mcl-1	Bcl-2-like protein 11	A:172-197;203-321	B:143-164	///	///	canonical	x-ray diffraction	2.00	20066663
2VM6	Bcl-2-related protein A1	Bcl-2-like protein 11	A:1-24;31-149	B:141-165	///	///	canonical	x-ray diffraction	2.20	18812174
2YJ1	Bcl-2-like protein 1	Bcl-2-binding component 3	A:1-26;83-202 C:1-26;83-196	B:133-153 D:133-153	///	B:W133[HT7].E136[B3E].Q140[B3Q].R143[HR7].D147[B3D].A150[B3A] D:W133[HT7].E136[B3E].Q140[B3Q].R143[HR7].D147[B3D].A150[B3A]	helix 1 dimer	x-ray diffraction	2.24	21744457
2YQ6	Bcl-2-like protein 1	Bcl-2-like protein 11	A:1-26,83-96	B:147-164	///	B:R154[MK8].E158[MK8]	helix 1 dimer		1.80	23151250
2YQ7	Bcl-2-like protein 2	Bcl-2-like protein 11	A:1-26,83-96	B:147-164	///	B:R154E.E158K	helix 1 dimer		1.90	23151250
3FDL	Bcl-2-like protein 1	Bcl-2-like protein 11	A:1-26;83-194	B:142-166(84-108)	///	///	helix 1 dimer	x-ray diffraction	1.78	19229915
3I1H	Bcl-2-related protein A1	Bcl-2 homologous antagonist/killer	A:4-24;30-150	B:72-87	///	///	canonical	x-ray diffraction	2.20	tbp
3IO8	Bcl-2-like protein 1	Bcl-2-like protein 11	A:1-26;83-108;112-197 C:1-26;83-197	B:144-166(54-76) D:143-161(53-71)	///	B:L152F(L62F) D:L152F(L62F)	helix 1 dimer	x-ray diffraction	2.30	19726685
3KJ0	Induced myeloid leukemia cell differentiation protein Mcl-1	Bcl-2-like protein 11	A:170-326	B:143-165	///	B:I148Y(I6Y)	canonical	x-ray diffraction	1.70	20066663
3KJ1	Induced myeloid leukemia cell differentiation protein Mcl-1	Bcl-2-like protein 11	A:171-322	B:143-164(1-22)	///	B:I148A(I6A).A164R(A22R)	canonical	x-ray diffraction	1.95	20066663
3KJ2	Induced myeloid leukemia cell differentiation protein Mcl-1	Bcl-2-like protein 11	A:172-322	B:143-164(1-22)	///	B:F159E(F17E).A164R(A22R)	canonical	x-ray diffraction	2.35	20066663
3KZ0	Induced myeloid leukemia cell differentiation protein Mcl-1	Bcl-2-like protein 11	A:172-195;203-321 B:172-195;201-321	C:143-173 D:143-173	///	C:I148A.L152I.F159N D:I148A.L152I.F159N	canonical	x-ray diffraction	2.35	20363230
3MK8	Induced myeloid leukemia cell differentiation protein Mcl-1	Induced myeloid leukemia cell differentiation protein Mcl-1	A:172-193;202-320	B:209-227(5-23)	///	B:Q221[MK8](Q17[MK8]).E225[MK8](E21[MK8])	canonical	x-ray diffraction	2.32	20562877
3MQP	Bcl-2-related protein A1	Phorbol-12-myristate-13-acetate-induced protein 1	A:2-151	B:19-43	///	///	canonical	x-ray diffraction	2.24	tbp
3PK1	Induced myeloid leukemia cell differentiation protein Mcl-1	Apoptosis regulator BAX	A:173-194;204-321 C:173-192;205-321	B:54-80 D:54-80	///	///	canonical	x-ray diffraction	2.49	21199865
3PL7	Bcl-2-like protein 1	Apoptosis regulator BAX	A:3-28;82-196 B:4-29;82-196	C:54-79	///	///	sandwiched	x-ray diffraction	2.61	21199865
3R85	Bcl-2-like protein 1	Heme-binding protein 2	A:4-26;83-197 B:4-26;83-197 C:3-26;83-197 D:3-26;83-197	E:153-172 F:152-170 G:153-171 H:152-170	///	///	helix 1 dimer	x-ray diffraction	1.95	21639858
4B4S	Bcl-2-like protein 10	Bcl-2-like protein 11	A:13-116(2-105);132-175(121-164)	B:143-166	A:C30S(C19S).C138S(C127S).C167S(C156S)	///	canonical	x-ray diffraction	1.90	23235460
4BD2	Apoptosis regulator BAX	BH3-interacting domain death agonist	A:10-37;49-167	B:76-105	///	///	core/latch dimer	x-ray diffraction	2.21	23374347
4BD6	Apoptosis regulator BAX	Apoptosis regulator BAX	A:10-37;49-167	B:54-73	///	///	core/latch dimer	x-ray diffraction	2.49	23374347
4BDU	Apoptosis regulator BAX	Apoptosis regulator BAX	A:55-122 C:54-122	B:54-122 D:54-122	///	///	bh3-in-groove symmetric dimer	x-ray diffraction	3.00	23374347
4BPK	Bcl-2-like protein 1	Bcl-2-binding component 3	A:1-26;83-195 B:2-26;83-195	C:133-152 D:133-152	///	C:W133[HT7](W1[HT7]).E136[B3E](E4[B3E]).Q140[B3Q](Q8[B3Q]).L141[AHP](L9[AHP]).R143[HR7](R11[HR7]).D147[B3D](D15[B3D]).A150[B3A](A18[B3A]) D:W133[HT7](W1[HT7]).E136[B3E](E4[B3E]).Q140[B3Q](Q8[B3Q]).L141[AHP](L9[AHP]).R143[HR7](R11[HR7]).D147[B3D](D15[B3D]).A150[B3A](A18[B3A])	helix 1 dimer	x-ray diffraction	1.76	23929624
4CIM	Bcl-2-like protein 2	Bcl-2-like protein 2	A:7-152 B:8-152	C:38-58 D:38-58	A:S19C.G43H.L46M.I49A.E128A.R133Q	C:H43G.M46L.A49I D:H43G.M46L.A49I	canonical	x-ray diffraction	1.50	25371206
4CIN	Bcl-2-like protein 1	Bcl-2-like protein 1	A:2-26;83-197 B:1-26;83-105;113-197	C:80-102 D:83-101	///	///	helix 1 dimer	x-ray diffraction	2.69	25371206
4HNJ	Bcl-2-like protein 1	Bcl-2-binding component 3	A:1-24;81-196 B:1-32;82-105;121-131;135-195	C:131-152	///	///	core/latch dimer	x-ray diffraction	2.90	23340338
4HW4	Induced myeloid leukemia cell differentiation protein Mcl-1	Induced myeloid leukemia cell differentiation protein Mcl-1	A:172-324 B:172-192;203-321	C:209-224 D:209-224	///	///	canonical	x-ray diffraction	1.53	23244564
4QVE	Bcl-2-like protein 1	BH3-interacting domain death agonist	A:4-25;85-198	B:77-104	///	///	canonical	x-ray diffraction	2.05	25907960
4Z9V	Bcl-2-like protein 1	Translationally-controlled tumor protein	A:1-26;83-208 B:1-26;83-207	C:15-29 D:14-29 E:11-31 F:11-30 G:11-31 H:11-31	///	///	helix 1 dimer	x-ray diffraction	2.10	26813996
4ZEQ	Bcl-2-related protein A1	BH3-interacting domain death agonist	A:3-151	B:79-104	///	///	canonical	x-ray diffraction	1.80	tbp
4ZIE	Apoptosis regulator BAX	Bcl-2-like protein 11	A:10-35;47-167	C:143-164	A:S62C.S126C	///	core/latch dimer	x-ray diffraction	1.80	26158515
4ZIF	Apoptosis regulator BAX	Bcl-2-like protein 11	A:11-37;48-166	B:144-159	A:S62C.S126C	///	core/latch dimer	x-ray diffraction	2.40	26158515
4ZIG	Apoptosis regulator BAX	BH3-interacting domain death agonist	A:10-36;42-166	B:79-98	A:S62C.S126C	///	core/latch dimer	x-ray diffraction	2.20	26158515
4ZIH	Apoptosis regulator BAX	Bcl-2-like protein 11	A:10-37;48-164	B:144-159	A:S62C.S126C	///	core/latch dimer	x-ray diffraction	2.50	26158515
4ZII	Apoptosis regulator BAX	BH3-interacting domain death agonist	A:10-37;44-167	C:76-99	A:S62C.I66A.S126C	///	core/latch dimer	x-ray diffraction	2.19	26158515
5AGW	Apoptosis regulator Bcl-2/Bcl-2-like protein 1	Bcl-2-like protein 11	A:8-31(Apoptosis regulator Bcl-2);43-44(90-91)(Bcl-2-like protein 1);92-204(Apoptosis regulator Bcl-2) B:10-31(Apoptosis regulator Bcl-2);43-44(90-91)(Bcl-2-like protein 1);92-204(Apoptosis regulator Bcl-2)	C:146-164(1-19) D:146-166(1-21)	///	C:W147[XCP](W2[XCP]).E151[AJE](E6[AJE]).R154[MH8](R9[MH8]).E158[MH8](E13[MH8]).A161[XCP](A16[XCP]) D:W147[XCP](W2[XCP]).E151[AJE](E6[AJE]).R154[MH8](R9[MH8]).E158[MH8](E13[MH8]).A161[XCP](A16[XCP])	canonical	x-ray diffraction	2.69	26317395
5AGX	Apoptosis regulator Bcl-2/Bcl-2-like protein 1	Bcl-2-like protein 11	A:8-32(Apoptosis regulator Bcl-2);43-44(90-91)(Bcl-2-like protein 1);92-204(Apoptosis regulator Bcl-2) B:8-32(Apoptosis regulator Bcl-2);42-44(89-91)(Bcl-2-like protein 1);92-204(Apoptosis regulator Bcl-2)	C:146-166(1-21) D:146-166(1-21)	///	B:W147[XCP](W2[XCP]).E151[AJE](E6[AJE]).R154[MH8](R9[MH8]).E158[MH8](E13[MH8]).A161[XCP](A16[XCP]) D:W147[XCP](W2[XCP]).E151[AJE](E6[AJE]).R154[MH8](R9[MH8]).E158[MH8](E13[MH8]).A161[XCP](A16[XCP])	canonical	x-ray diffraction	2.24	26317395
5C3F	Induced myeloid leukemia cell differentiation protein Mcl-1	BH3-interacting domain death agonist	A:173-322	B:80-101	///	B:Q92L.S96L.M97L	canonical	x-ray diffraction	1.43	28970875
5C6H	Induced myeloid leukemia cell differentiation protein Mcl-1	E3 ubiquitin-protein ligase HUWE1	A:171-325 C:171-325 E:171-324 G:171-324 I:171-325 J:171-323 M:171-325 O:171-325 Q:171-324 S:171-324 U:171-321 W:171-323	B:1969-1993 D:1969-1994 F:1969-1994 H:1969-1994 K:1969-1992 L:1969-1994 N:1969-1994 P:1969-1994 R:1969-1992 T:1969-1994 V:1970-1992 X:1969-1993	///	///	canonical	x-ray diffraction	2.05	tbp
5FMK	Bcl-2-like protein 1	Bcl-2 homologous antagonist/killer	A:2-26(58-82);83-207(83-207)	B:69-89	///	///	helix 1 dimer	x-ray diffraction	1.73	27198225
5UUL	Bcl-2-related protein A1	Bcl-2-binding component 3	A:1-151	B:132-154	///	///	canonical	x-ray diffraction	1.33	28594323
5UUM	Induced myeloid leukemia cell differentiation protein Mcl-1	Bcl-2-binding component 3	A:172-325 B:172-325	C:132-154 D:132-154	///	C:A134V.G138A.Q140G.M144A.L148V.Y152V D:A134V.G138A.Q140G.M144A.L148V.Y152V	canonical	x-ray diffraction	2.35	28594323
5VAU	Apoptosis regulator Bcl-2/Bcl-2-like protein 1	Beclin-1	A:1-31(Apoptosis regulator Bcl-2);42-43(90-91)(Bcl-2-like protein 1);92-206(Apoptosis regulator Bcl-2) B:10-31(Apoptosis regulator Bcl-2);41-43(89-91)(Bcl-2-like protein 1);92-203(Apoptosis regulator Bcl-2) C:9-31(Apoptosis regulator Bcl-2);42-43(90-91)(Bcl-2-like protein 1);92-204(Apoptosis regulator Bcl-2) D:10-31(Apoptosis regulator Bcl-2);42-43(90-91)(Bcl-2-like protein 1);92-203(Apoptosis re…	E:109-128 F:108-128 G:108-127 H:108-127	///	///	canonical	x-ray diffraction	1.75	tbp
5VAX	Apoptosis regulator Bcl-2/Bcl-2-like protein 1	Beclin-1	A:9-31(Apoptosis regulator Bcl-2);41-43(89-91)(Bcl-2-like protein 1);92-207(Apoptosis regulator Bcl-2) B:7-31(Apoptosis regulator Bcl-2);39-43(87-91)(Bcl-2-like protein 1);92-207(Apoptosis regulator Bcl-2) C:10-31(Apoptosis regulator Bcl-2);42-43(90-91)(Bcl-2-like protein 1);92-203(Apoptosis regulator Bcl-2) D:10-32(Apoptosis regulator Bcl-2);43(91)(Bcl-2-like protein 1);92-203(Apoptosis regulato…	E:108-129 F:108-128 G:107-129 H:108-128	///	E:T108[TPO] F:T108[TPO] G:T108[TPO] H:T108[TPO]	canonical	x-ray diffraction	2.00	tbp
5VWV	Bcl-2 homologous antagonist/killer	Bcl-2-like protein 11	A:23-186	B:141-165	///	B:W147R.Y162T	core/latch dimer	x-ray diffraction	1.90	29149594
5VWW	Bcl-2 homologous antagonist/killer	Bcl-2-like protein 11	A:23-50;67-181 B:23-45;67-185	C:142-166 D:143-161	///	C:W147R.Y162T D:W147R	domain-swapped dimer	x-ray diffraction	2.80	29149594
5VWX	Bcl-2 homologous antagonist/killer	Bcl-2-like protein 11	A:23-48;65–185 C:23-49;65-184	B:142-164 D:142-164	///	B:M142S.P144I.E145I.I146S.W147R.I155[9R4].Y162T D:M142S.P144I.E145I.I146S.W147R.I155[9R4].Y162T	core/latch dimer	x-ray diffraction	2.49	29149594
5VWY	Bcl-2 homologous antagonist/killer	Bcl-2-like protein 11	A:23-48;57-62;66–186	B:141-165	///	B:W147R.I155[9R1].Y162T	core/latch dimer	x-ray diffraction	1.55	29149594
5VWZ	Bcl-2 homologous antagonist/killer	Bcl-2-like protein 11	A:23-186 C:23-184	B:141-166 D:141-166	///	B:I155[9R1] D:I155[9R1]	core/latch dimer	x-ray diffraction	1.62	29149594
5VX0	Bcl-2 homologous antagonist/killer	Bcl-2-like protein 11	A:23-185 C:23-49;54-185	B:141-165 D:142-165	///	B:W147R.I155[9R7].Y162T D:W147R.I155[9R7].Y162T	core/latch dimer	x-ray diffraction	1.60	29149594
5VX3	Bcl-2-like protein 1	Bcl-2-like protein 11	A:1-26;83-196 C:1-26;83-196 E:1-26;83-197 G:1-26;83-197	B:142-162 D:143-164 F:143-164 H:142-164	///	B:W147R(W89R).I155[9R1](I97[9R1]) D:W147R(W89R).I155[9R1](I97[9R1]).Y162T(Y104T) F:W147R(W89R).I155[9R1(I97[9R1]).Y162T(Y104T) H:W147R(W89R).I155[9R1](I97[9R1]).Y162T(Y104T)	helix 1 dimer	x-ray diffraction	1.95	29149594
5W89	Induced myeloid leukemia cell differentiation protein Mcl-1	Bcl-2-like protein 11	A:172-191;202-321	B:146-165	///	B:I148[NLE].A149[MK8].R153[MK8].I155L.F159I.Y162R	canonical	x-ray diffraction	1.42	29339518
5W8F	Induced myeloid leukemia cell differentiation protein Mcl-1	Bcl-2-like protein 11	A:172-320	B:147-165	///	B:I148[NLE].A149[MK8].E151S.R153[MK8].I155L.F159I	canonical	x-ray diffraction	1.85	29339518
6DCN	Bcl-2-like protein 1	Beclin-1	A:1-26;83-197 B:1-26;83-198	C:107-127 D:107-127	///	C:T108[TPO] D:T108[TPO]	helix 1 dimer	x-ray diffraction	2.44	30626284
6DCO	Bcl-2-like protein 1	Beclin-1	A:1-26;83-198 B:1-26;83-198	C:108-127 D:108-128	///	C:T108D D:T108D	helix 1 dimer	x-ray diffraction	2.20	30626284
6QFI	Induced myeloid leukemia cell differentiation protein Mcl-1	Bcl-2-like protein 11	A:172-197;202-322	B:143-159	///	///	canonical	x-ray diffraction	2.40	31459977
6QFM	Induced myeloid leukemia cell differentiation protein Mcl-1	Bcl-2-binding component 3	A:171-193;204-320	B:131-149	A:D173E.G241D.F246L.V251I.K255S.S280T.V281I.F286C.T293S.Q322E	///	canonical	x-ray diffraction	2.00	31459977
6QG8	Apoptosis regulator Bcl-2/Bcl-2-like protein 1	Bcl-2-binding component 3	A:10-31(Apoptosis regulator Bcl-2);42-44(Bcl-2-like protein 1);92-203(Apoptosis regulator Bcl-2)	B:129-147	A:H20S.D34[null].L95Q.R106L.F124G.R127Y.G128A.R129S.P168V.L175A.T178A.E179T.R183D	///	canonical	x-ray diffraction	1.90	31459977
6UA3	Induced myeloid leukemia cell differentiation protein Mcl-1	Bcl-2-like protein 11	A:172-325	B:146-166(4-24)	///	B:I148[NLE](I6[NLE]).A149[AIB](A8[AIB]).E151G(E9G).L152[ALC](L10[ALC]).I155L(I13L).F159I(F17I)	canonical	x-ray diffraction	1.55	tbp
6UAB	Induced myeloid leukemia cell differentiation protein Mcl-1	Bcl-2-like protein 11	A:172-325	B:146-166(4-24)	///	B:I148[NLE](I6[NLE]).A149[AIB](A8[AIB]).E151G(E9G).L152[ALC](L10[ALC]).I155L(I13L).F159I(F17I)	canonical	x-ray diffraction	2.10	tbp
6VBX	Induced myeloid leukemia cell differentiation protein Mcl-1	Bcl-2-like protein 11	A:173-193,203-321	B:148-159(1-12)	///	B:Q150E(Q3E), B:E151Q(E4Q)	canonical	x-ray diffraction	1.95	33797903
